# Supplementary material
Source: Springer Nature journal article supplement (https://www.springermedizin.de/resource/supplementary/13002_2013_399_MOESM2_ESM.pdf/9626822)

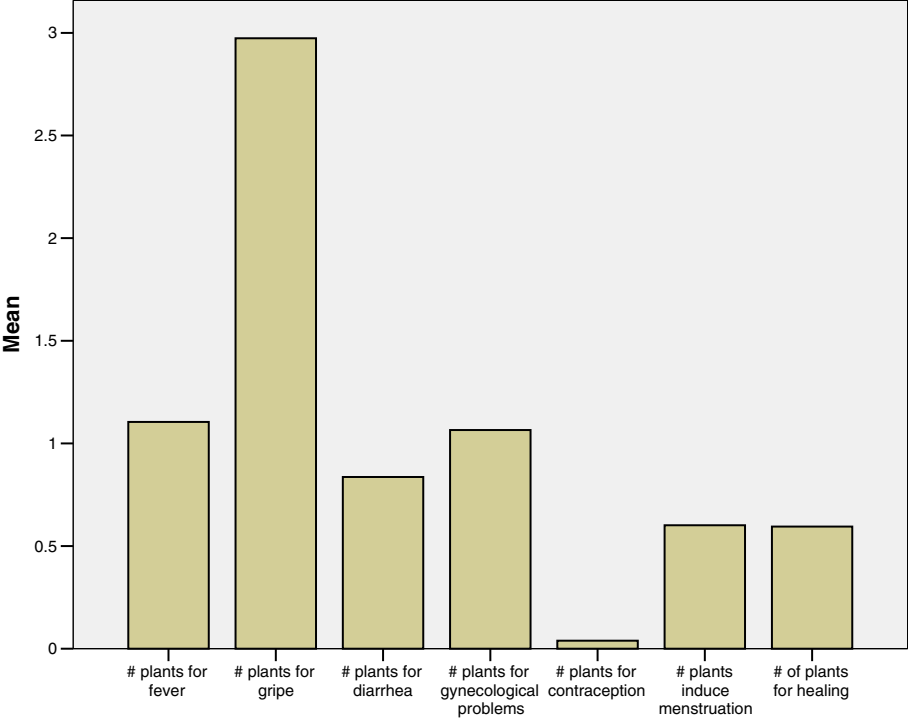

Supplement: MOESM2 [file 9626822]
